# Supplementary material
Source: ML conference proceedings conference paper supplement (https://openaccess.thecvf.com/content/WACV2022/html/Cheng_VCSeg_Virtual_Camera_WACV_2022_paper.html)
Supplement: Supplementary file 2 [file Cheng_VCSeg_Virtual_Camera_WACV_2022_supplemental.zip]

Archive with 2 entries (1 files):
- 0109-supp/
- 0109-supp/0109-supp.pdf
